# Supplementary material for: A free-standing aligned-carbon-nanotube/nanocomposite foil as an efficient counter electrode for dye solar cells
Source: Royal Society of Chemistry journal article supplement (doi:10.1039/c2ee21569a), 2012-01-01
Supplement: c2ee21569a.pdf [file c2ee21569a.pdf]

# A free-standing aligned-carbon-nanotubes/nanocomposite foil as efficient counter electrode for dye solar cells

Francesco Malara, Michele Manca\*, Maurizio Lanza, Christof Hübner, Elpida Piperopoulos and Giuseppe Gigli

## Morphological characterization of the VACNTs film

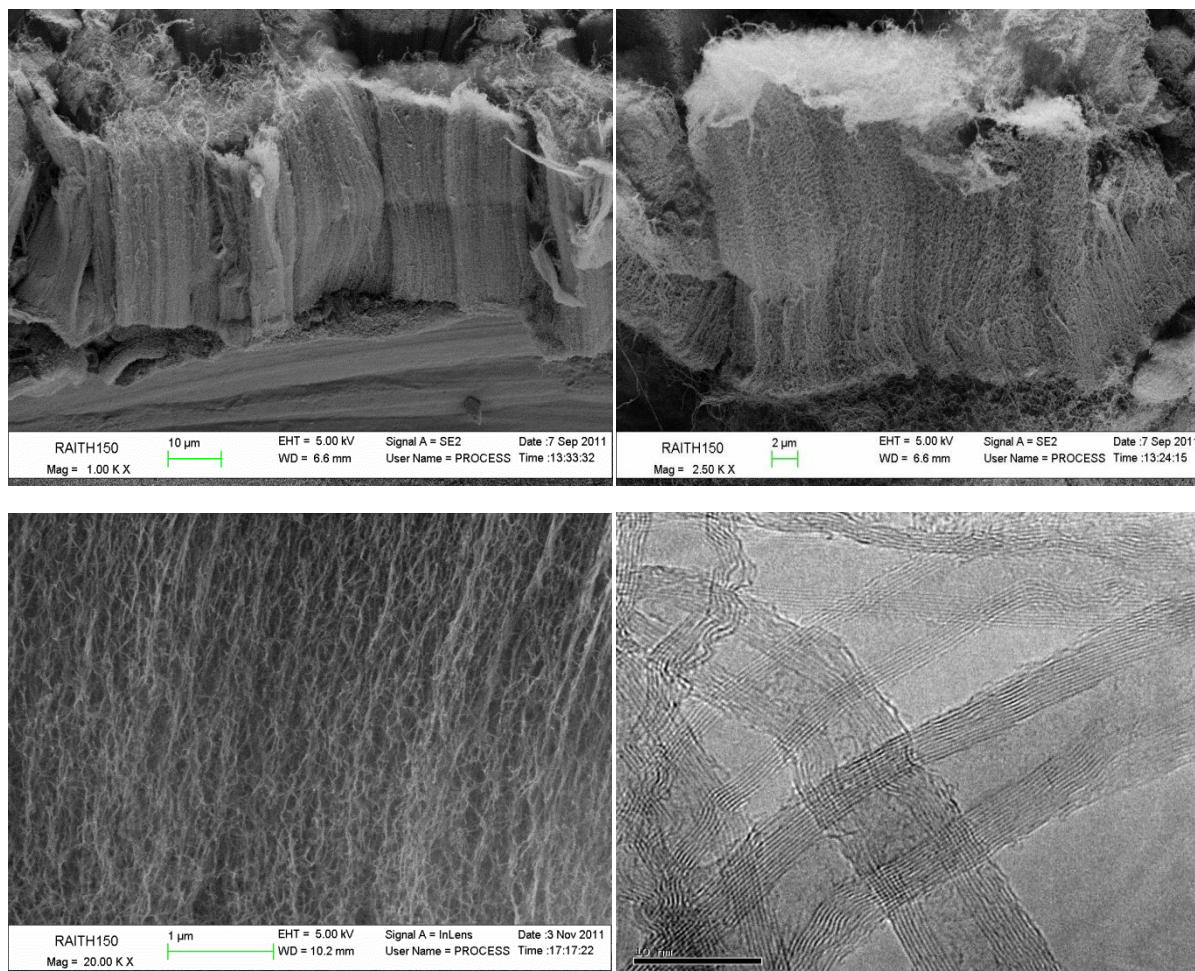

**Figure S1.** a), b) SEM micrographs showing the top layer of a VANC foil. c) cross-sectional view of the CNT-s forest ; d) TEM micrograph of the multi-walled CNTs (scale bar 10 nm).

## Mechanical characterization of the nanocomposite foils

To compare the mechanical properties of the here proposed nanocomposite foils, their tensile properties ( $E_t$  Young' modulus and  $\sigma_B$  stress at break) have been measured according to the procedure described by ASTM D882 - 10 Standard Test Method for Tensile Properties of Thin Plastic Sheeting.

The stress-strain curves have been detected by using a Q800 DMA system from TA Instruments. Measurements have been carried out at the following working conditions: control force regime ; pre-load= 0.01N,  $T=25^\circ\text{C}$  ; force rate 0.5N/min up to 18N.

|         | $E_t$ (MPa)      | $\sigma_B$ (MPa) |
|---------|------------------|------------------|
| NC      | $705.6 \pm 30.2$ | $18.3 \pm 0.3$   |
| NC-Etch | $755.7 \pm 33.6$ | $19.5 \pm 0.6$   |
| VANC    | $780.1 \pm 27.3$ | $19.2 \pm 1.1$   |

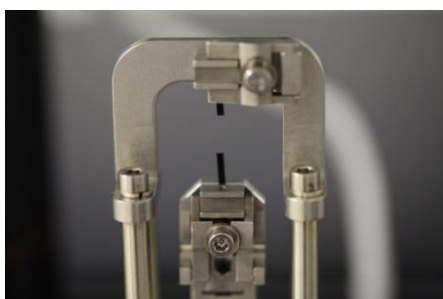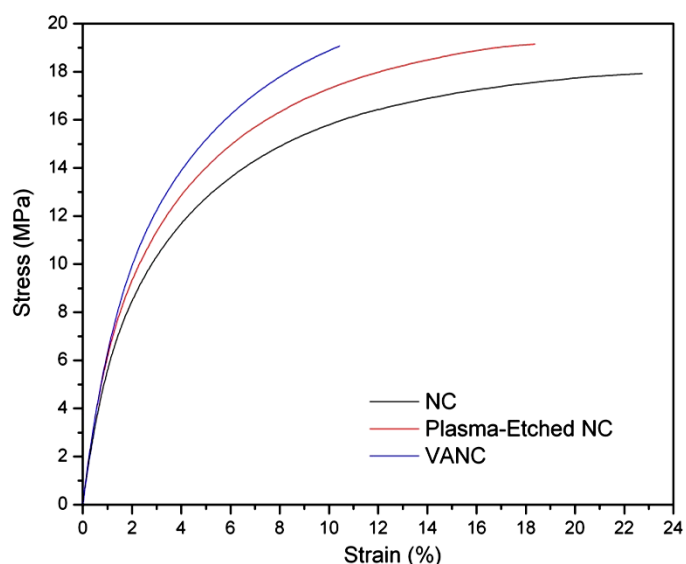

**Figure S2:** Stress-strain curves measured for three different species of nanocomposite foils

### Electrical characterization upon vigorous bending

Sheet resistance of the VANC foil has been evaluated upon two different bending conditions by using a Keithley unit (Model 2400 Source Meter). The nominal value of  $R_s$  was thus determined by averaging fifteen measured data over 3 different samples. 20mm x 5mm-sized strips of VANC (thickness 360  $\mu\text{m}$ ) were used for this test. A specific run of fifteen I-V tests (in the range 0-10 V) was executed for each sample on different points of the surface both under concave and convex bending: a radius of curvature of 7 mm was adopted in both of the cases.

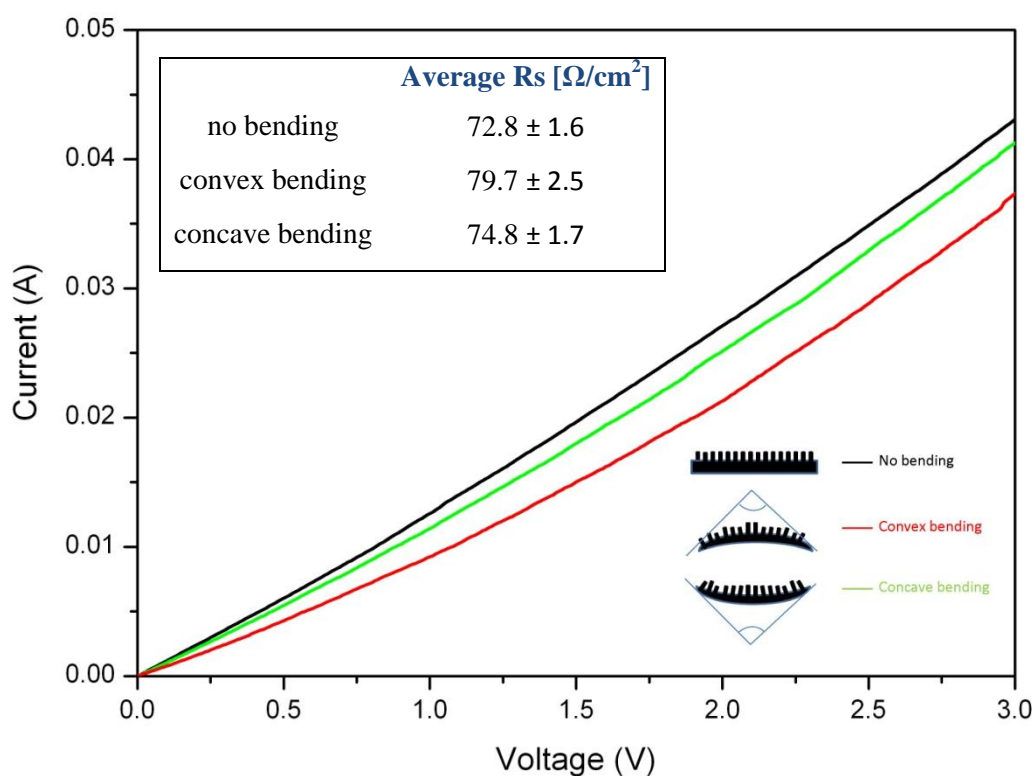

**Figure S3.** *I-V characteristics of a VANC foil which has been subjected to a specific flexural stress.*
